# Supplementary material
Source: MDPI journal article supplement (https://www.mdpi.com/2073-431X/12/2/31)

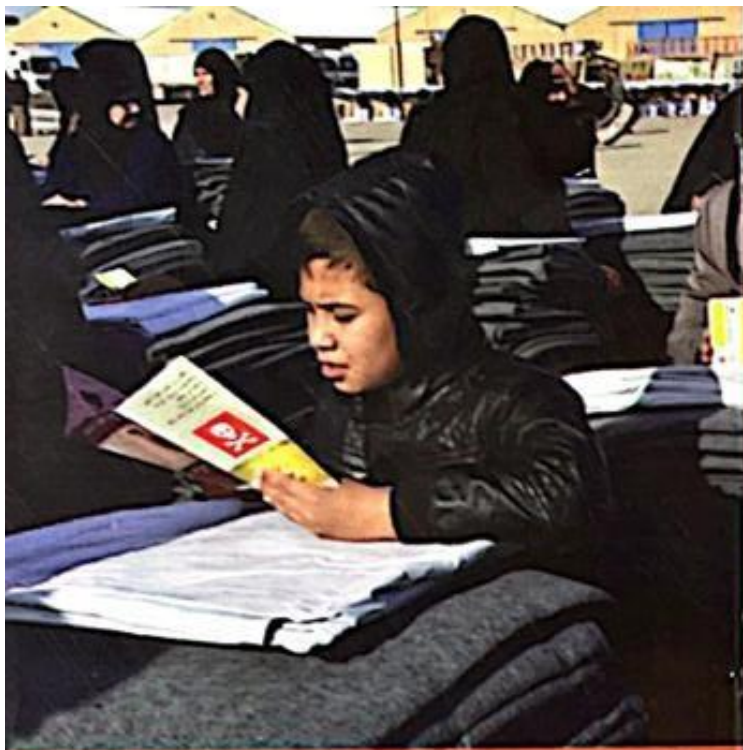

١. امسح ال (QR Code) للذهاب الى موقع الواقع المعزز ثم امنح الموقع الاذن بفتح الكاميرا.
٢. قم بمسح الكود لمشاهدة المقذوفات بشكل ثلاثي الابعاد

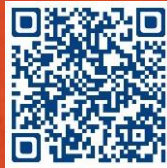

QR Code

OK

خطر ٤

B

خطر ٣

C

خطر ٢

G

خطر ١

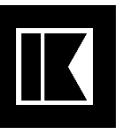

خطر ٨

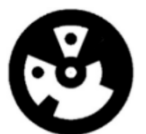

خطر ٧

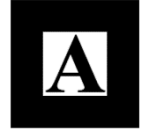

خطر ٦

F

خطر ٥

بلغ السلطات المختصة عن مكانها  
وحذر الأهالي منها،  
فقد تنقذ حياة قريب أو جار لك

2016.0579/002.07.2017 30000

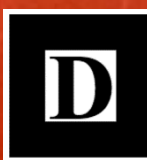

خطر ١٠

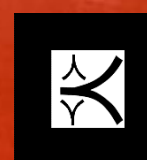

خطر ٩

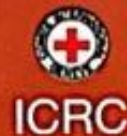

ICRC

احذر الذخائر القابلة للانفجار  
لا تلمسها!!

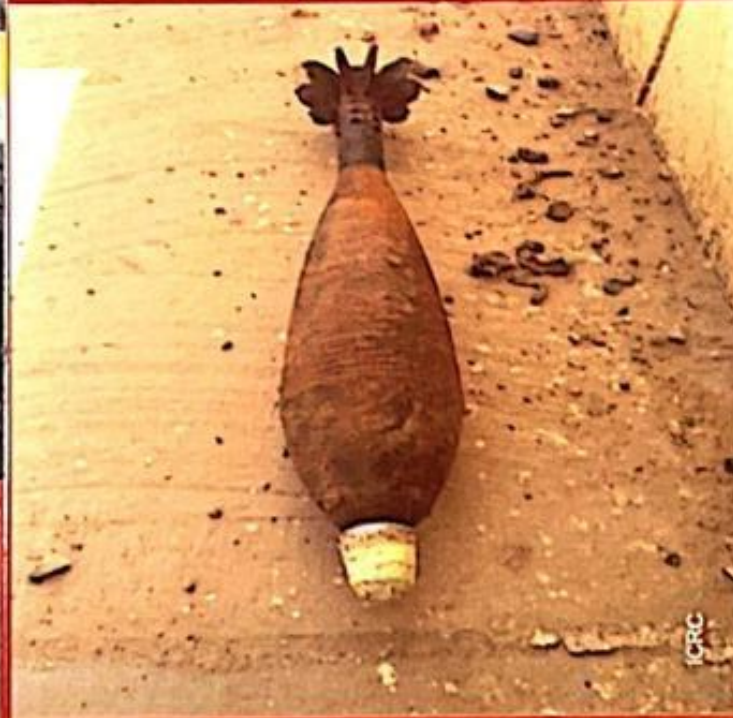

ICRC

- لا تقترب من الذخائر القابلة للانفجار
- لا تلمسها أو تحركها أو تعبت بها
- لا تبحث في الأنقاض
- لا تجمع الخرقة المعدنية
- لا تحتفظ بالذخائر القابلة للانفجار كتذكارات

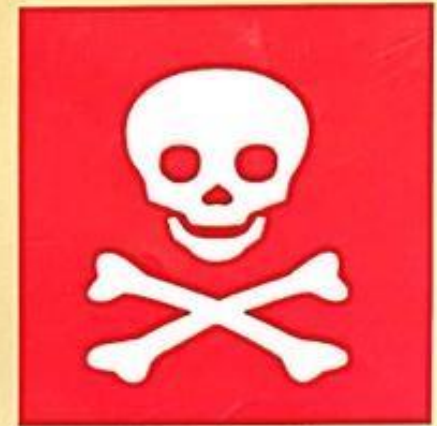

الممسوحة ضوئياً بـ CamScanner

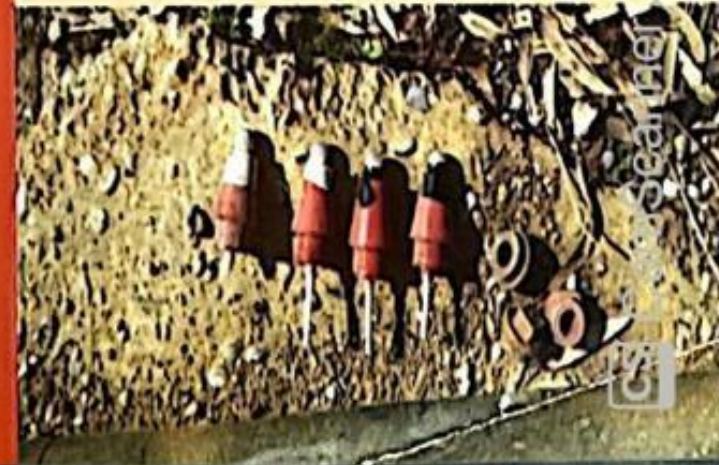

ICRC



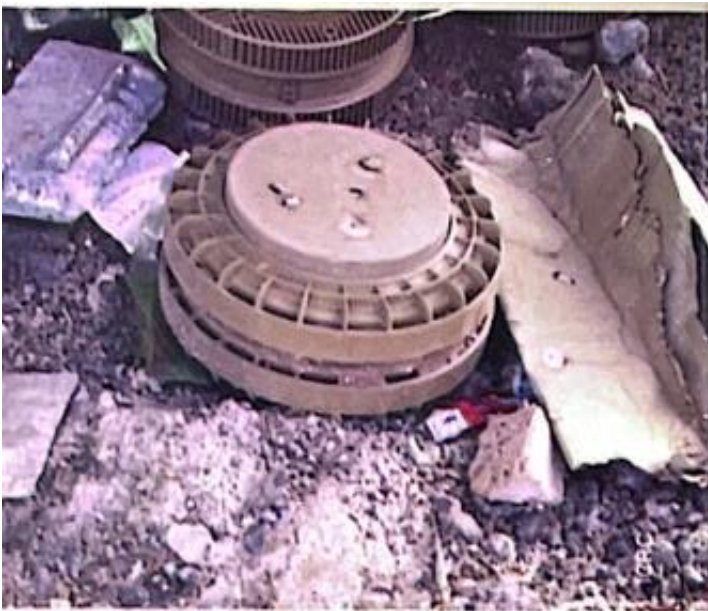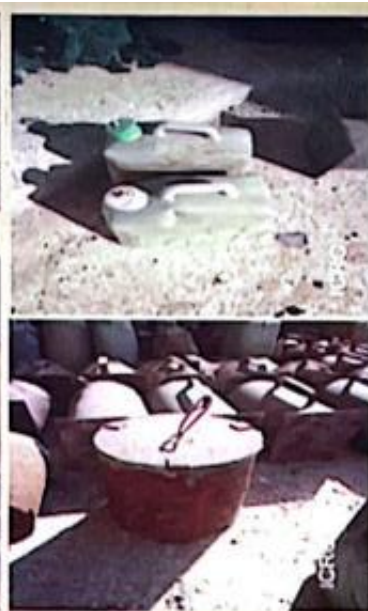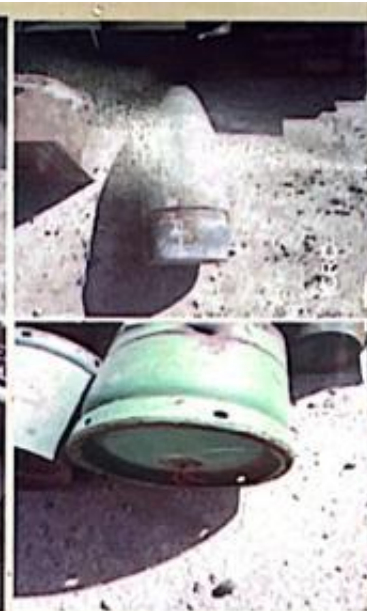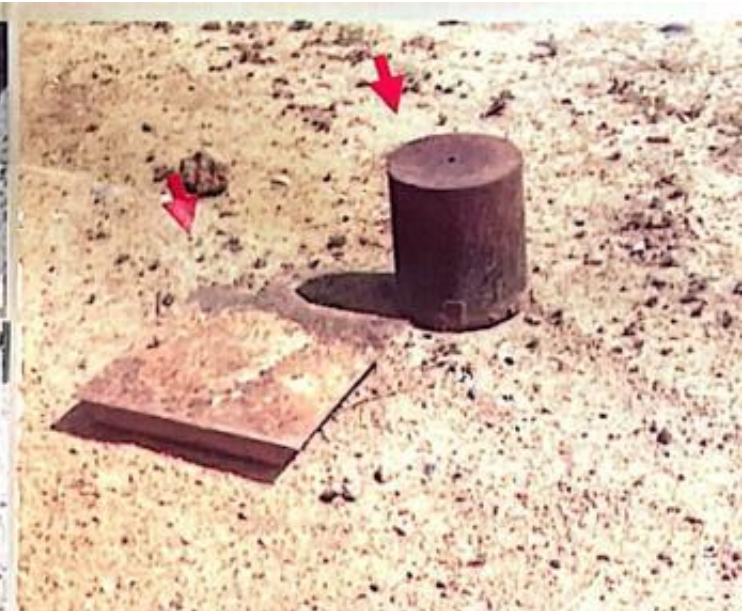

### أين يمكن أن تجد الذخائر القابلة للانفجار؟

قد تجدها في أي مكان، داخل المبنى أو خارجة أو ملقاة على الأرض، أو مخبئة داخل الأراضي الزراعية أو تحت الانقاض

### أنواع الذخائر

تختلف الذخائر القابلة للانفجار بأشكالها، وأحجامها، وأنواعها، وبشكل جميعها خطراً على حياتك

### ما هي الذخائر القابلة للانفجار؟

هي القنابل، والصواريخ، وقذائف المدفعية والهاون، والأسلحة الخفيفة، والألغام، والعبوات الناسفة، وكل ما شابه ذلك من المواد أو المكونات القابلة للانفجار

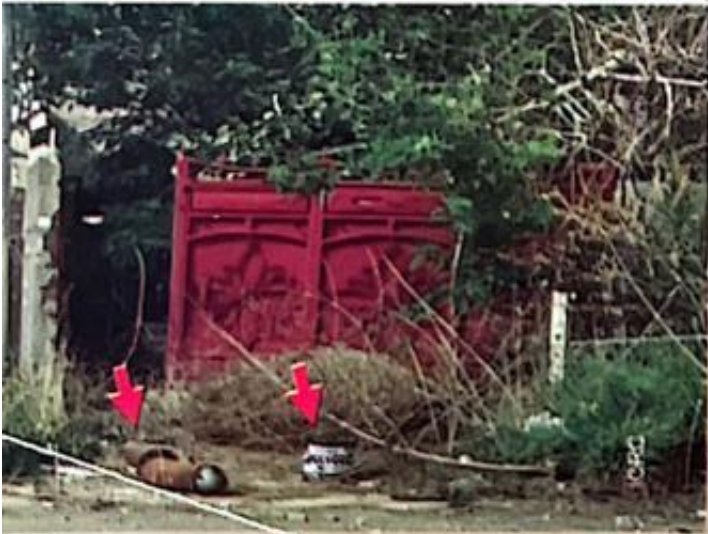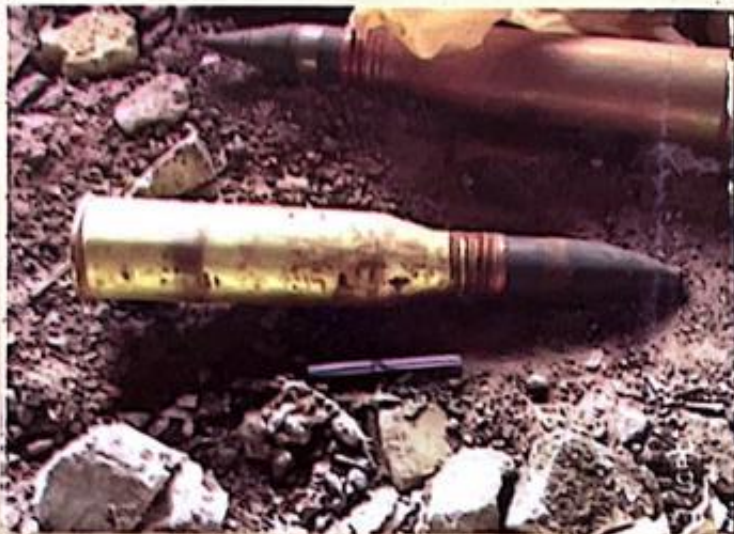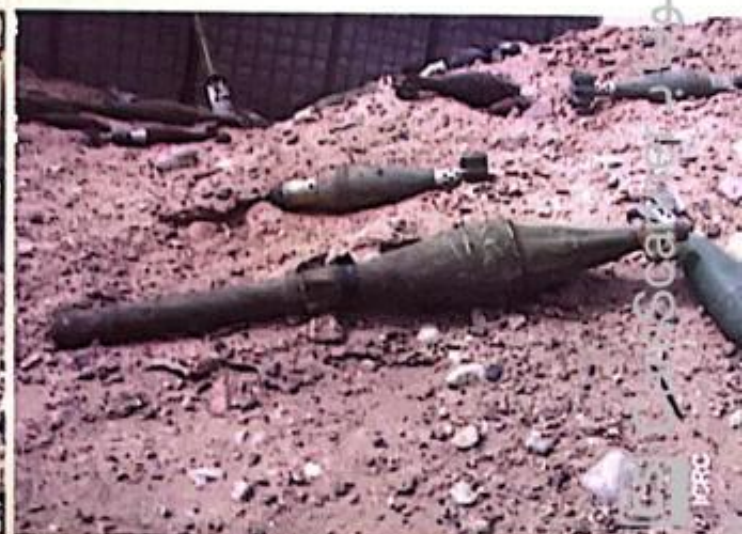

Supplement: s1 [file s1]
