# Supplementary material
Source: MDPI journal article supplement (https://www.mdpi.com/2073-431X/12/2/31)
Supplement: s1 [file s1]

**Appendix A:** supplementary file to the study entitled  
**“The use of Web Augmented Reality for Unexplosive Ordnance Risk Education”**

List of experts who reviewed, and validate the questionnaire form.

| No | Name                                    | Workplace                                                                                  | Job Title                                          | Contact Info.                             |
|----|-----------------------------------------|--------------------------------------------------------------------------------------------|----------------------------------------------------|-------------------------------------------|
| 1  | Oday Abd<br>Mohammad                    | Civil Defense<br>Directorate in<br>Salah al-Din                                            | Senior UXO deminer                                 | 00964-770 201 0462                        |
| 2  | Jassim S. Adnan                         | Head of UXO<br>treatment<br>Division at Civil<br>Defense<br>Directorate in<br>Salah al-Din | Senior UXO deminer                                 | 00964-770 405 0040                        |
| 3  | Razwan M. Salah                         | University of<br>Duhok/ Faculty of<br>Science/ Computer<br>science Dept.                   | Extended reality<br>expert                         | 00964- 750 4736993<br>Razwan.mayi@uod.ac  |
| 4  | Ass. Prof. Dr.<br>Abdulla M.<br>Abdulla | Tikrit University/<br>Collage of<br>Administration and<br>Economics                        | Questionnaire<br>validation and testing<br>expert. | Abdulrahman13@tu.edu.iq                   |
| 5  | Ass. Prof. Dr.<br>Thamer A.<br>Hawas    | Tikrit University/<br>Collage of<br>Administration and<br>Economics                        | Questionnaire<br>validation and testing<br>expert. | 00964-771 064 8255<br>Dr.thamer@tu.edu.iq |
