# Supplementary material
Source: MDPI journal article supplement (https://www.mdpi.com/2073-431X/12/2/31)
Supplement: s1 [file s1]

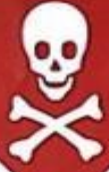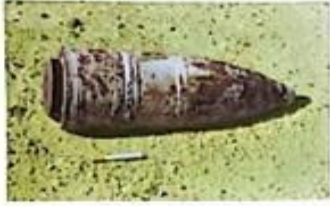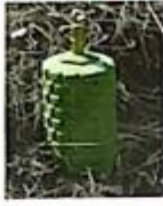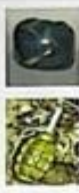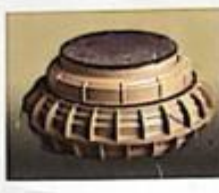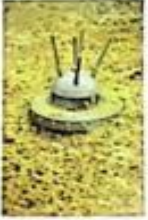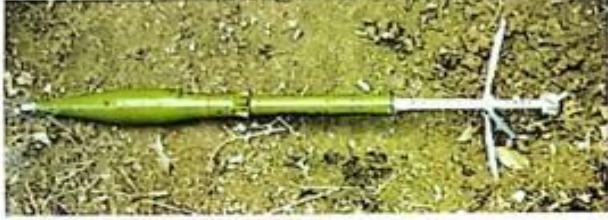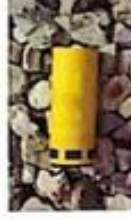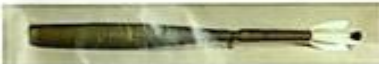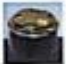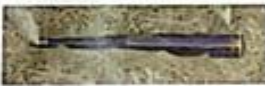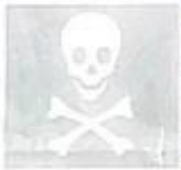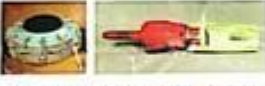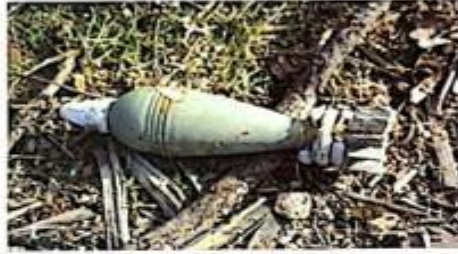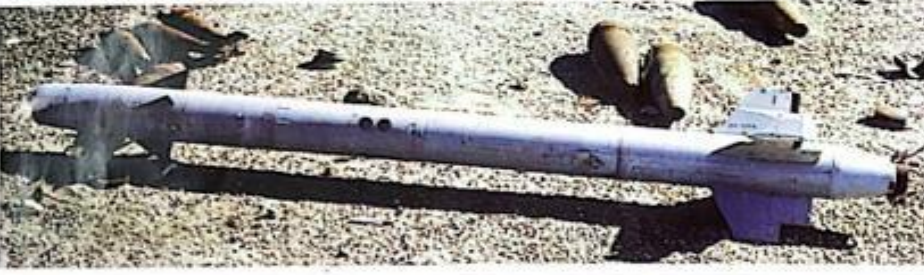

تذكر مكانها المحدد وبلغ المسؤولين والأشخاص  
الآخرين عن مكانها.  
بإعلانك الآخرين يمكن أن تنقذ حياة شخص آخر!

تختلف  
المخلفات الحربية المتفجرة  
بأشكالها وألوانها  
و أحجامها.  
من الممكن أن  
تتفجر بفعل لمسة خفيفة.

لا تقترب منها!  
لا ترم أي شيء عليها!  
لا تلمسها!

المخلفات الحربية المتفجرة  
مواد شديدة الانفجار وهي  
تقتل و تجرح حتى وإن كانت  
على مسافة بعيدة.

١. امسح ال (QR Code) للذهاب الى موقع الواقع المعزز ثم  
امنح الموقع الاذن بفتح الكاميرا.  
٢. قم بمسح الكود لمشاهدة المقذوفات بشكل ثلاثي الابعاد

خطر!  
مخلفات  
حربية متفجرة

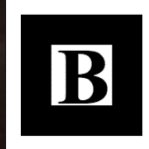

خطر ٣

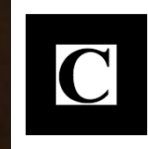

خطر ٢

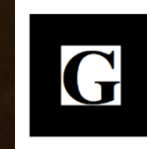

خطر ١

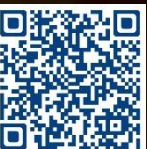

QR Code

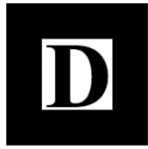

خطر ١٠

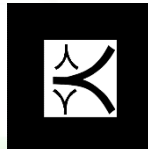

خطر ٩

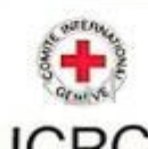

ICRC

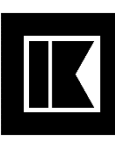

خطر ٨

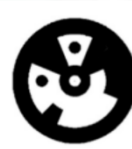

خطر ٧

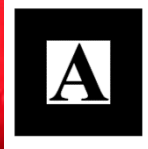

خطر ٦

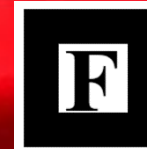

خطر ٥

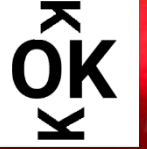

خطر ٤
