# Supplementary material
Source: MDPI journal article supplement (https://www.mdpi.com/2073-431X/12/2/31)
Supplement: s1 [file s1]

**File B:** supplementary file to the study entitled

**“The use of Web Augmented Reality for Unexplosive Ordnance Risk Education”**

**Demographic information**

This questionnaire is part of scientific research that studies the effect of networked augmented reality on introducing the dangers of remnants of war and unexploded mines to middle and Preparatory school students in the city of Tikrit. This survey will ask you 21 questions divided into six groups.

**Age:** - 12-14/ 15-17

**Gender:** Male Female

**Daily Internet use:** (I do not use the Internet daily) (less than an hour) (from one to two hours) (more than three hours)

**General themes**

**1. Knowledge of risks: Knowledge of mine risks and the impact of knowledge on peers**

- I. I generally understand the dangers of mines.
- II. I understand the dangers of mines that my family and friends may be exposed to.
- III. I have already discussed with my colleagues the dangers of mines and foreign objects.
- IV. I recommend my colleagues and family members to stay away from mines and foreign objects.

**2. Being in Dangerous Places: Being in places where unexploded ordnance is present**

- I. I have never been in an area with unexploded mines.
- II. I have been in an area where there are unexploded mines before, and I did not know that.
- III. I have been in an area where there are unexploded mines, and I know that.

**3. Identify the forms and types of ordnance.**

- I. I've seen real ordnance in my life.
- II. My friends or family members saw real ordnance.
- III. I can easily identify remnants of war.

**4. Learning resources about the dangers of unexploded ordnance.**

- I. I've seen Paper publications about learning about the dangers of ordnance of war.
- II. I saw advertisements on social media.
- III. I've heard announcements on local radio about the dangers of Learning.

**5. user experience**

- I. I have prior knowledge of the concept of augmented reality
- II. I can easily use the augmented reality web app.
- III. The web application response is fast.
- IV. The 3D models in augmented reality are well visible.
- V. The application contributed to increasing my knowledge of the ordnance of war.
